# Supplementary material for: Multifunctional lanthanide MOFs with active sites as new platforms for smart sensing of methylmalonic acid and anti-counterfeiting applications
Source: Royal Society of Chemistry journal article supplement (doi:10.1039/d2tc04978c), 2023-01-01
Supplement: d2tc04978c1.pdf [file d2tc04978c1.pdf]

## *Electronic Supplementary Information*

### **Multifunctional lanthanide MOFs with active sites as new platform for smart sensing of methylmalonic acid and anti-counterfeiting applications**

Xiangmei Lu, Yue Tang, Guoping Yang\* and Yao-Yu Wang

Key Laboratory of Synthetic and Natural Functional Molecule of the Ministry of Education, Shaanxi Key Laboratory of Physico-Inorganic Chemistry, Xi'an Key Laboratory of Functional Supramolecular Structure and Materials, College of Chemistry & Materials Science, Northwest University, Xi'an 710127, Shaanxi, P. R. China.

\*Email: [ygp@nwu.edu.cn](mailto:ygp@nwu.edu.cn)

## Materials and Instrumentations

All the reagents and solvents were purchased to use without further purification in the experiments. Infrared spectra were examined on Bruker EQUINOX-55 spectrophotometer in 4000–400  $\text{cm}^{-1}$  (KBr pellets). Powder X-ray diffraction patterns were investigated through Bruker D8 ADVANCE X-ray powder diffractometer. Thermogravimetric analyses were tested on NETZSCH STA 449C microanalyzer ( $\text{N}_2$  atmosphere,  $10\text{ }^\circ\text{C min}^{-1}$ ). UV-vis spectra were measured on Hitachi U-3310 spectrometer. Luminescent spectra were determined on an Edinburgh FLS920 fluorescence spectrometer. The absolute quantum yields were tested on FluoroMax-4 spectrophotometer.

## X-ray Crystal Structure Determination

The single-crystal X-ray diffractions were tested on Bruker SMART APEX II CCD diffractometer equipped with graphite monochromated Mo  $K\alpha$  radiation ( $\lambda = 0.71073\text{ \AA}$ ) via  $\phi/\omega$  scan method. The diffraction data were corrected for Lorentz and polarization effects for empirical absorption based on multiscan. The structures were solved by the direct methods and refined on  $F_2$  via *SHELXTL* program. The anisotropic thermal parameters were applied to non-hydrogen atoms. The hydrogen atoms of ligands were calculated and added at ideal positions.

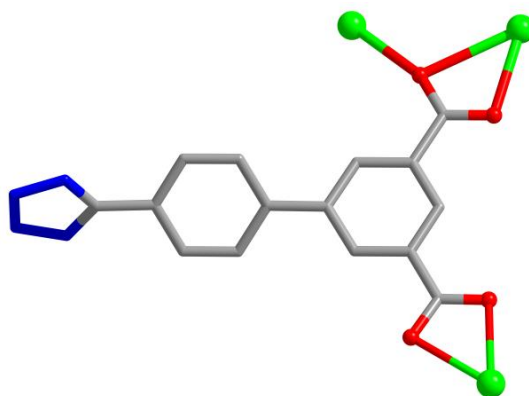

**Fig. S1** The coordination modes of  $\text{L}^{3-}$  in **1-Eu**.

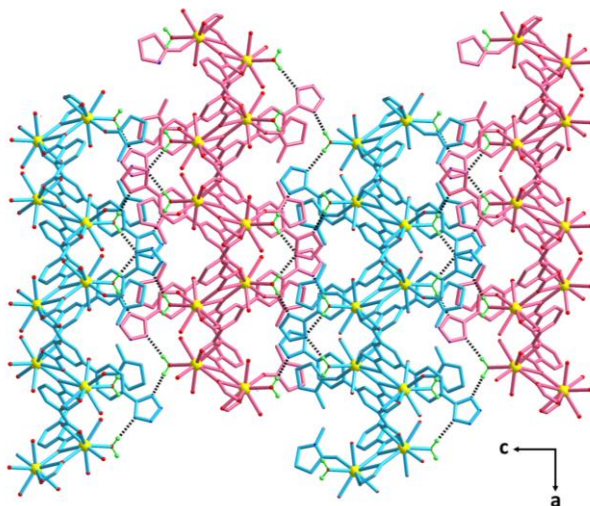

**Fig. S2** The 3D framework of **1-Eu** along the *b* axis.

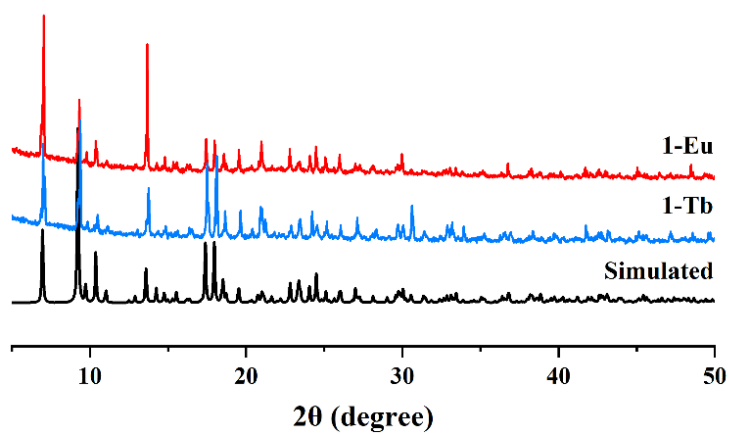

**Fig. S3** PXRD patterns of **1-Eu** simulated from the X-ray single-crystal structure and as-synthesized samples of **1-Eu** and **1-Tb**.

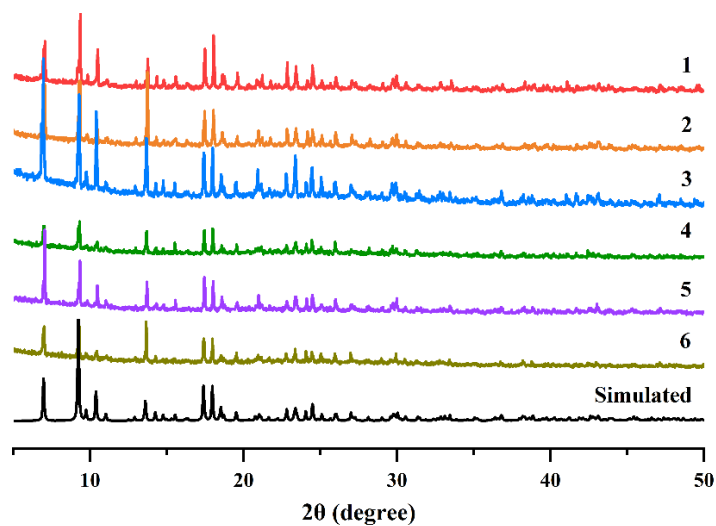

**Fig. S4** PXRD patterns of doped samples.

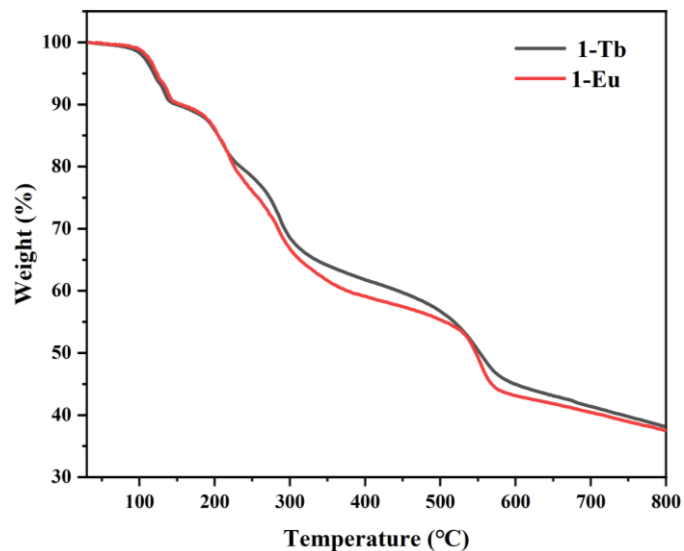

**Fig. S5** The TGA plots of **1-Eu** and **1-Tb** under N<sub>2</sub> environment.

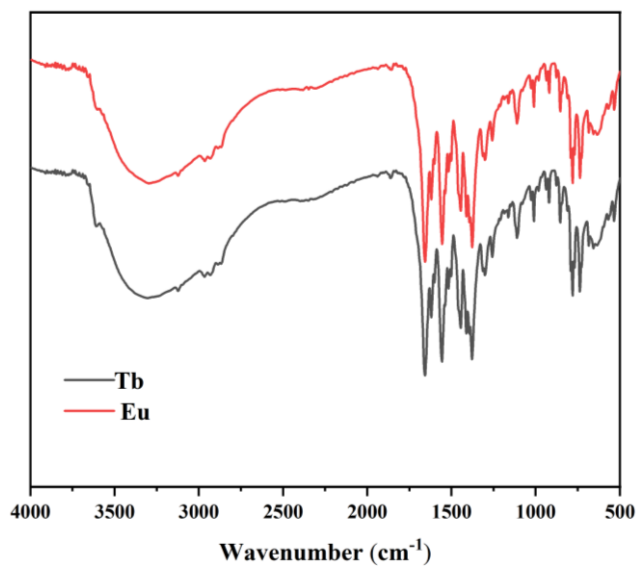

**Fig. S6** The FT-IR spectra of **1-Eu** and **1-Tb**.

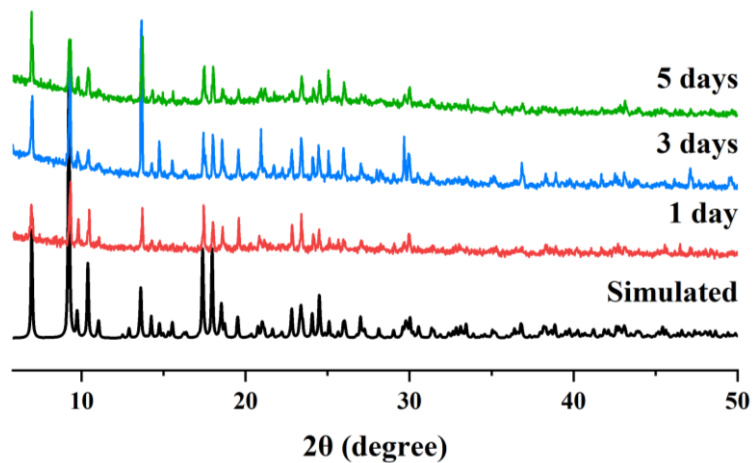

**Fig. S7** PXRD of **1-Eu** after being immersed in the H<sub>2</sub>O for 1-5 days.

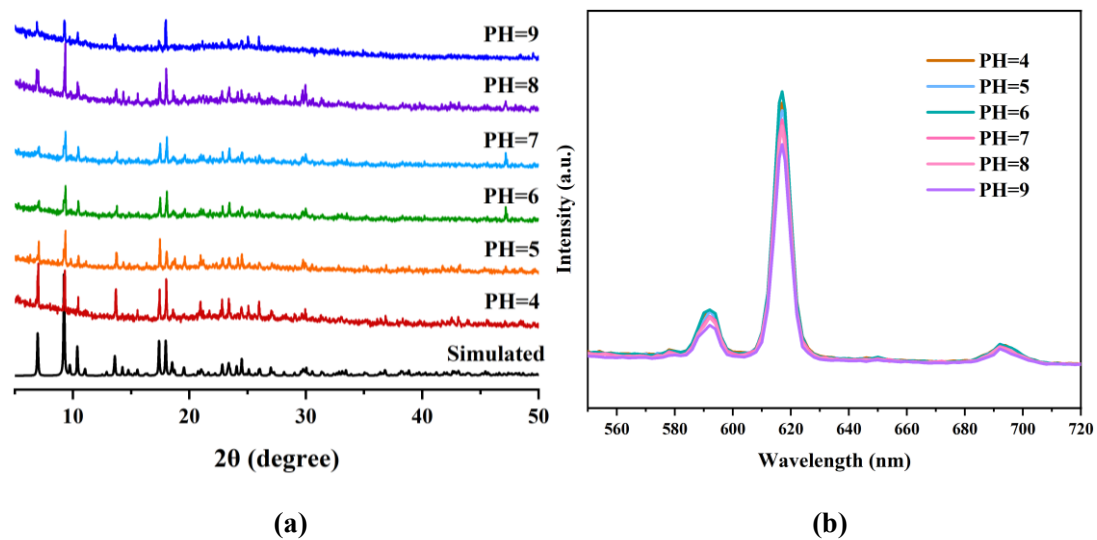

**Fig. S8** The PXRD patterns and luminescence spectra of **1-Eu** in different pH conditions.

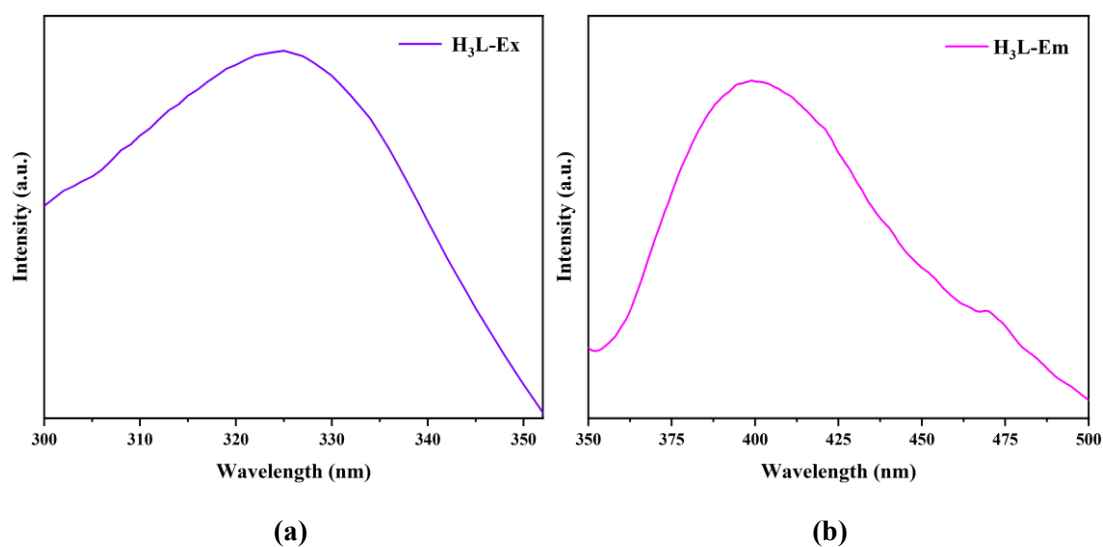

**Fig. S9** Excitation (a) and emission (b) spectra of H<sub>3</sub>L ( $\lambda_{\text{ex}}=324$  nm).

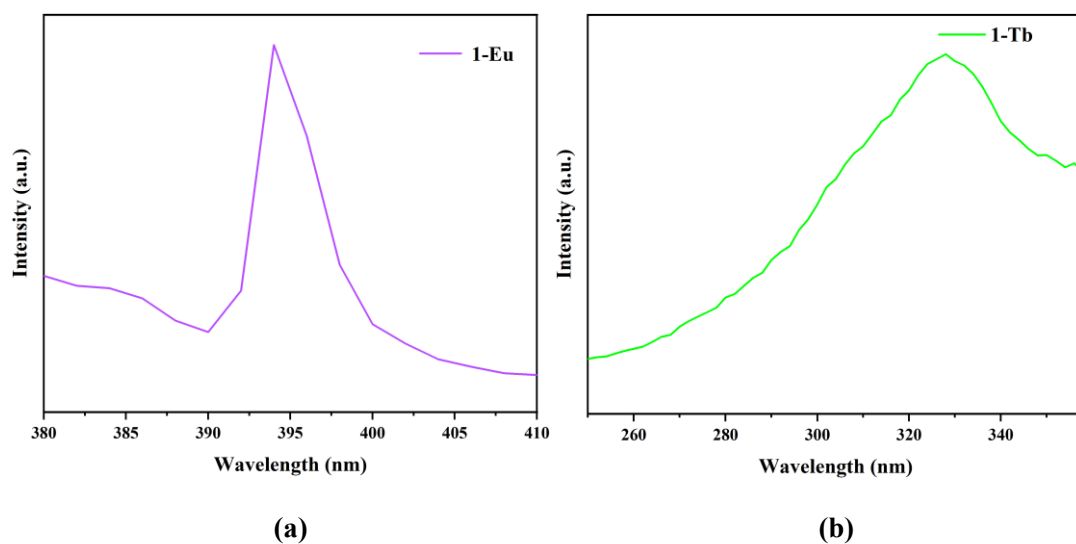

**Fig. S10** (a) Solid state excitation spectra of **1-Eu** ( $\lambda_{\text{ex}} = 394$  nm) and (b) **1-Tb** ( $\lambda_{\text{ex}} = 330$  nm).

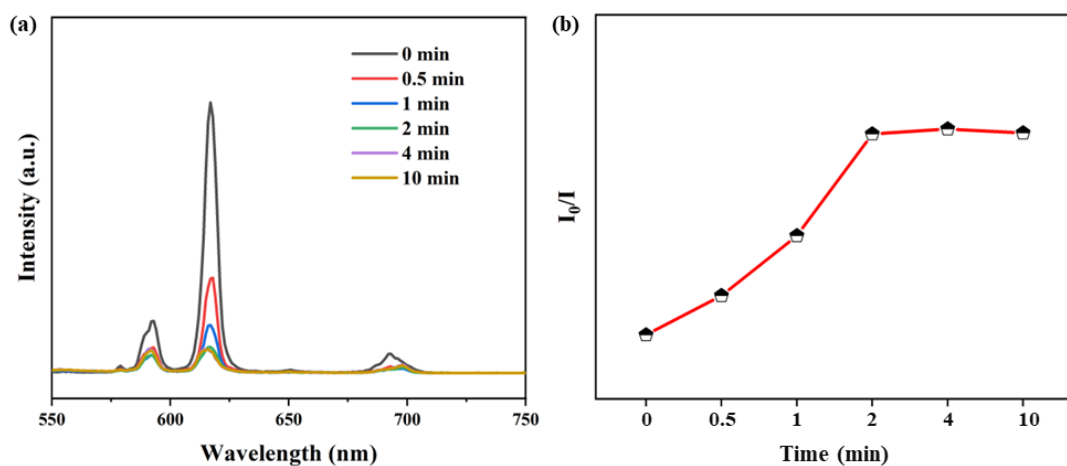

**Fig. S11** (a) Variation of fluorescence intensity of **1-Eu** with different immersion time in MMA; (b) The corresponding line chart.

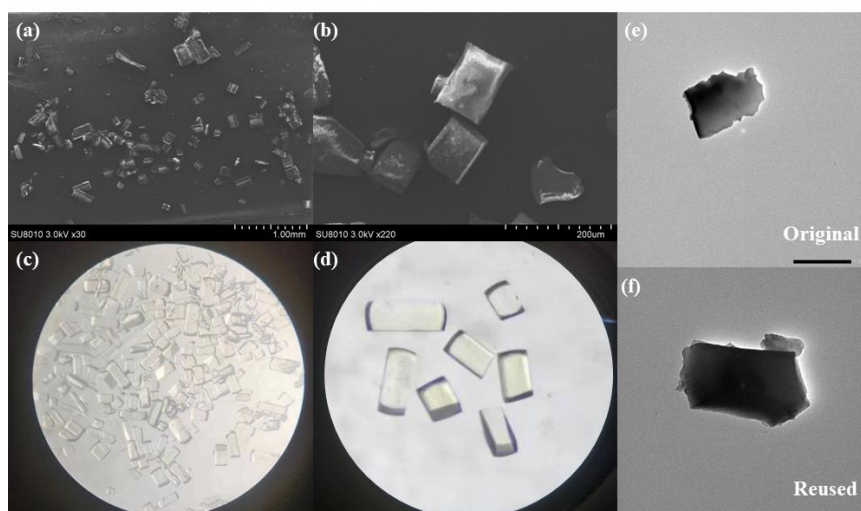

**Fig. S12** The SEM images (a, b) and optical images (c, d) of **1-Eu**; The TEM images of the original (e) and reused (f) samples.

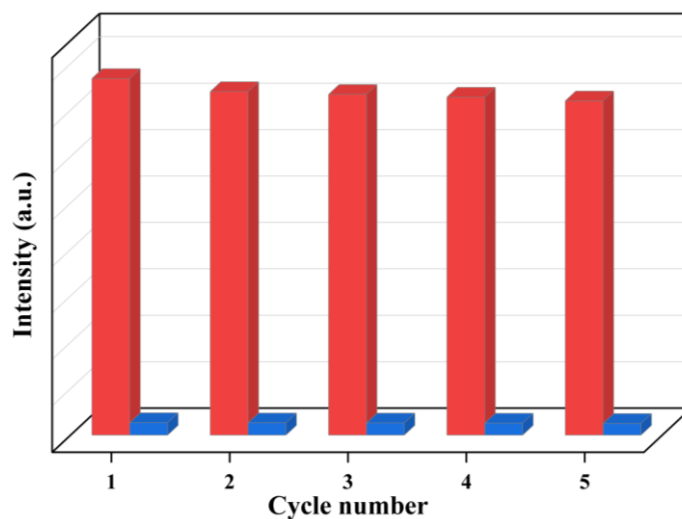

**Fig. S13** Luminescence intensity of **1-Eu** adding MMA during recycle.

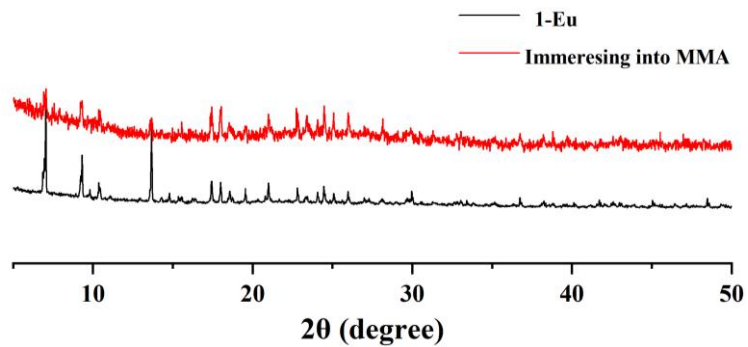

**Fig. S14** PXR D patterns of **1-Eu** and **1-Eu** immersing into MMA.

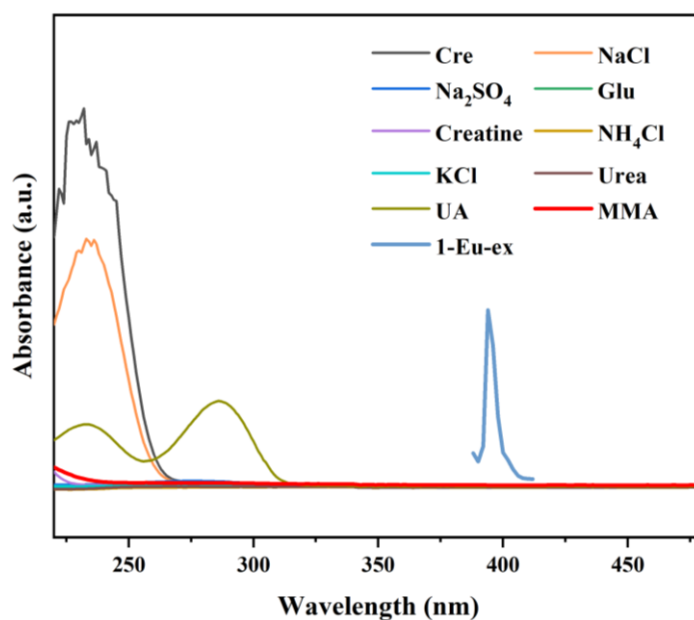

**Fig. S15** UV-vis absorption spectra of Urea, Cre, NaCl, Glu, Na<sub>2</sub>SO<sub>4</sub>, UA, KCl, Creatine, NH<sub>4</sub>Cl, MMA and the excitation spectrum of **1-Eu**.

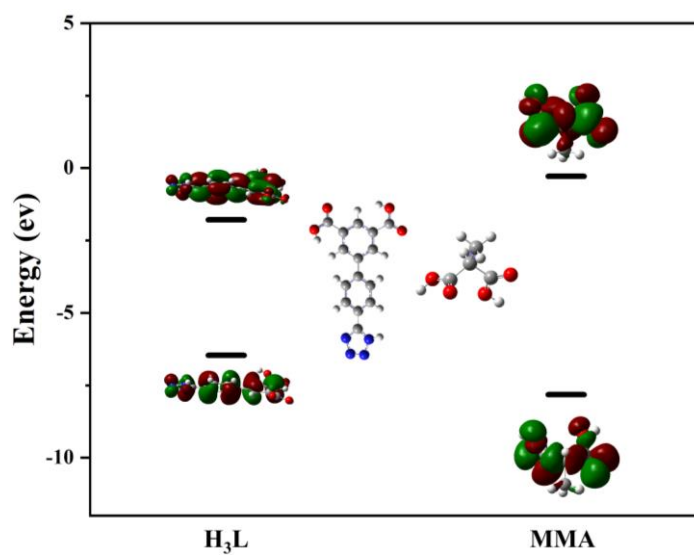

**Fig. S16** Theoretical HOMO and LUMO for H<sub>3</sub>L and MMA in water.

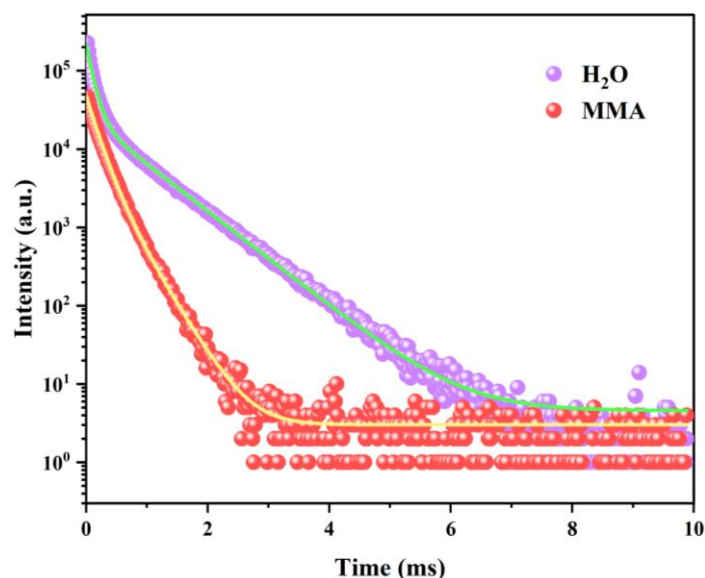

**Fig. S17** Luminescence decay curves of **1-Eu** immersed in H<sub>2</sub>O and MMA.

**Table S1** Selected bond lengths (Å) and bond angles (°) for **1-Eu** and **1-Tb**.

| <b>1-Eu</b>          |            |                    |           |
|----------------------|------------|--------------------|-----------|
| Eu(1)-O(4)#2         | 2.4740(18) | O(3)-Eu(1)-O(2)#1  | 115.26(6) |
| Eu(1)-O(5)#2         | 2.4779(18) | O(3)-Eu(1)-O(2)    | 50.37(6)  |
| Eu(1)-O(2)           | 2.7196(18) | O(3)-Eu(1)-O(1)    | 94.16(7)  |
| Eu(1)-O(2)#1         | 2.4651(18) | O(3)-Eu(1)-O(7)    | 81.16(7)  |
| Eu(1)-O(3)           | 2.4051(18) | O(3)-Eu(1)-C(1)    | 24.62(7)  |
| Eu(1)-O(1)           | 2.425(2)   | O(1)-Eu(1)-Eu(1)#1 | 69.50(5)  |
| Eu(1)-O(7)           | 2.433(2)   | O(1)-Eu(1)-O(4)#2  | 138.94(7) |
| Eu(1)-O(6)           | 2.3555(19) | O(1)-Eu(1)-O(5)#2  | 140.79(6) |
| Eu(1)-O(8)           | 2.4937(19) | O(1)-Eu(1)-O(2)#1  | 74.12(7)  |
| O(4)#2-Eu(1)-Eu(1)#1 | 100.56(4)  | O(1)-Eu(1)-O(2)    | 71.79(6)  |
| O(4)#2-Eu(1)-O(5)#2  | 52.77(6)   | O(1)-Eu(1)-O(7)    | 138.65(7) |
| O(4)#2-Eu(1)-O(2)    | 120.22(6)  | O(1)-Eu(1)-O(8)    | 70.66(7)  |
| O(4)#2-Eu(1)-O(8)    | 128.71(6)  | O(1)-Eu(1)-C(7)#2  | 149.56(7) |
| O(4)#2-Eu(1)-C(7)#2  | 26.12(6)   | O(1)-Eu(1)-C(1)    | 81.89(7)  |
| O(4)#2-Eu(1)-C(1)    | 127.10(7)  | O(7)-Eu(1)-Eu(1)#1 | 147.64(6) |
| O(5)#2-Eu(1)-Eu(1)#1 | 71.41(4)   | O(7)-Eu(1)-O(4)#2  | 68.54(7)  |
| O(5)#2-Eu(1)-O(2)    | 73.34(6)   | O(7)-Eu(1)-O(5)#2  | 78.35(7)  |
| O(5)#2-Eu(1)-O(8)    | 138.46(7)  | O(7)-Eu(1)-O(2)#1  | 144.58(6) |
| O(5)#2-Eu(1)-C(7)#2  | 26.68(7)   | O(7)-Eu(1)-O(2)    | 127.84(7) |
| O(5)#2-Eu(1)-C(1)    | 74.34(6)   | O(7)-Eu(1)-O(8)    | 68.56(7)  |



|                      |            |                    |           |
|----------------------|------------|--------------------|-----------|
| O(2)-Eu(1)-Eu(1)#1   | 31.12(4)   | O(7)-Eu(1)-C(7)#2  | 70.49(7)  |
| O(2)#1-Eu(1)-Eu(1)#1 | 34.77(4)   | O(7)-Eu(1)-C(1)    | 104.48(8) |
| O(2)#1-Eu(1)-O(4)#2  | 76.61(6)   | O(6)-Eu(1)-Eu(1)#1 | 118.65(5) |
| O(2)#1-Eu(1)-O(5)#2  | 75.72(6)   | O(6)-Eu(1)-O(4)#2  | 76.03(7)  |
| O(2)#1-Eu(1)-O(2)    | 65.89(6)   | O(6)-Eu(1)-O(5)#2  | 128.47(6) |
| O(2)#1-Eu(1)-O(8)    | 144.19(6)  | O(6)-Eu(1)-O(2)    | 142.37(7) |
| O(2)#1-Eu(1)-Eu(1)#1 | 34.77(4)   | O(6)-Eu(1)-O(2)#1  | 88.45(7)  |
| O(2)#1-Eu(1)-O(4)#2  | 76.61(6)   | O(6)-Eu(1)-O(3)    | 150.59(7) |
| O(2)#1-Eu(1)-O(5)#2  | 75.72(6)   | O(6)-Eu(1)-O(1)    | 75.03(7)  |
| O(2)#1-Eu(1)-O(2)    | 65.89(6)   | O(6)-Eu(1)-O(7)    | 89.13(8)  |
| O(2)#1-Eu(1)-O(8)    | 144.19(6)  | O(6)-Eu(1)-O(8)    | 76.57(7)  |
| O(2)#1-Eu(1)-C(7)#2  | 75.52(7)   | O(6)-Eu(1)-C(7)#2  | 102.09(7) |
| O(2)-Eu(1)-C(7)#2    | 97.64(6)   | O(6)-Eu(1)-C(1)    | 156.07(7) |
| O(2)-Eu(1)-C(1)      | 25.78(6)   | O(8)-Eu(1)-Eu(1)#1 | 130.63(5) |
| O(2)#1-Eu(1)-C(1)    | 91.31(7)   | O(8)-Eu(1)-O(2)    | 107.89(6) |
| O(3)-Eu(1)-Eu(1)#1   | 80.98(4)   | O(8)-Eu(1)-C(7)#2  | 139.03(7) |
| O(3)-Eu(1)-O(4)#2    | 124.44(6)  | O(8)-Eu(1)-C(1)    | 90.00(7)  |
| O(3)-Eu(1)-O(5)#2    | 76.76(6)   |                    |           |
| <b>1-Tb</b>          |            |                    |           |
| Tb(1)-O(4)#1         | 2.4571(15) | O(2)-Tb(1)-C(15)#1 | 101.38(6) |
| Tb(1)-O(3)#1         | 2.4507(15) | O(2)-Tb(1)-C(14)   | 24.45(6)  |
| Tb(1)-O(1)           | 2.7615(16) | O(8)-Tb(1)-O(1)    | 108.50(6) |
| Tb(1)-O(1)#2         | 2.4325(16) | O(8)-Tb(1)-C(15)#1 | 138.83(6) |
| Tb(1)-O(2)           | 2.3699(16) | O(8)-Tb(1)-C(14)   | 90.46(6)  |
| Tb(1)-O(8)           | 2.4724(17) | O(7)-Tb(1)-O(4)#1  | 68.76(6)  |
| Tb(1)-O(7)           | 2.4044(18) | O(7)-Tb(1)-O(3)#1  | 78.31(6)  |
| Tb(1)-O(6)           | 2.3292(17) | O(7)-Tb(1)-O(1)#2  | 145.02(6) |
| Tb(1)-O(5)           | 2.3962(18) | O(7)-Tb(1)-O(1)    | 127.21(7) |
| O(4)#1-Tb(1)-O(1)    | 120.44(5)  | O(7)-Tb(1)-O(8)    | 68.33(6)  |
| O(4)#1-Tb(1)-O(8)    | 128.01(6)  | O(7)-Tb(1)-C(15)#1 | 70.54(6)  |
| O(4)#1-Tb(1)-C(15)#1 | 26.35(6)   | O(7)-Tb(1)-C(14)   | 104.20(7) |
| O(4)#1-Tb(1)-O(8)    | 128.01(6)  | O(6)-Tb(1)-O(4)#1  | 75.97(6)  |
| O(4)#1-Tb(1)-C(15)#1 | 26.35(6)   | O(6)-Tb(1)-O(3)#1  | 128.75(6) |
| O(4)#1-Tb(1)-C(14)   | 127.70(6)  | O(6)-Tb(1)-O(1)#2  | 87.78(6)  |
| O(3)#1-Tb(1)-O(4)#1  | 53.24(5)   | O(6)-Tb(1)-O(1)    | 141.57(6) |
| O(3)#1-Tb(1)-O(1)    | 73.03(5)   | O(6)-Tb(1)-O(2)    | 150.70(6) |
| O(3)#1-Tb(1)-O(8)    | 138.71(6)  | O(6)-Tb(1)-O(8)    | 76.51(6)  |

|                      |           |                     |           |
|----------------------|-----------|---------------------|-----------|
| O(3)#1-Tb(1)-C(15)#1 | 26.93(6)  | O(6)-Tb(1)-O(7)     | 90.59(7)  |
| O(3)#1-Tb(1)-C(14)   | 74.46(5)  | O(6)-Tb(1)-O(5)     | 75.53(6)  |
| O(1)#2-Tb(1)-O(4)#1  | 76.98(5)  | O(6)-Tb(1)-C(15)#1  | 102.22(6) |
| O(1)#2-Tb(1)-O(3)#1  | 75.68(5)  | O(6)-Tb(1)-C(14)    | 155.26(6) |
| O(1)#2-Tb(1)-O(1)    | 65.66(6)  | O(5)-Tb(1)-O(4)#1   | 139.74(6) |
| O(1)#2-Tb(1)-O(8)    | 144.08(6) | O(5)-Tb(1)-O(3)#1   | 139.94(5) |
| O(1)-Tb(1)-C(15)#1   | 97.60(6)  | O(5)-Tb(1)-O(1)     | 70.87(5)  |
| O(1)#2-Tb(1)-C(15)#1 | 75.69(6)  | O(5)-Tb(1)-O(1)#2   | 74.09(6)  |
| O(1)-Tb(1)-C(14)     | 25.58(6)  | O(5)-Tb(1)-O(8)     | 70.79(6)  |
| O(1)#2-Tb(1)-C(14)   | 90.96(6)  | O(5)-Tb(1)-O(7)     | 138.86(6) |
| O(2)-Tb(1)-O(4)#1    | 125.36(6) | O(5)-Tb(1)-C(15)#1  | 149.75(6) |
| O(2)-Tb(1)-O(3)#1    | 77.21(5)  | O(5)-Tb(1)-C(14)    | 80.36(6)  |
| O(2)-Tb(1)-O(1)#2    | 114.84(5) | C(15)#1-Tb(1)-C(14) | 101.38(6) |
| O(2)-Tb(1)-O(1)      | 49.99(5)  | C(15)-O(4)-Tb(1)#3  | 92.99(13) |
| O(2)-Tb(1)-O(8)      | 74.30(6)  | C(15)-O(3)-Tb(1)#3  | 92.64(13) |
| O(2)-Tb(1)-O(7)      | 81.15(7)  | Tb(1)#2-O(1)-Tb(1)  | 114.34(6) |
| O(2)-Tb(1)-O(5)      | 92.33(6)  |                     |           |

Symmetry transformations used to generate equivalent atoms:

**1-Eu:** #1 -x+1,-y+1,-z+1; #2 -x+3/2,y+1/2,z; #3 -x+3/2,y-1/2,z. **1-Tb:** #1 -x+1/2,y+1/2,z; #2 -x+1,-y+1,-z+1; #3 -x+1/2,y-1/2,z; #4 x,-y+1/2,z-1/2; #5 x-1/2,-y+1/2,-z+1.

**Table S2** HOMO and LUMO energies for H<sub>3</sub>L and MMA.

| Analytes         | HOMO (eV) | LUMO (eV) | Band Gap (eV) |
|------------------|-----------|-----------|---------------|
| H <sub>3</sub> L | -6.46     | -1.79     | 4.67          |
| MMA              | -7.82     | -0.29     | 7.53          |

**Table S3** The luminescence decay times of **1-Eu** in H<sub>2</sub>O and MMA.

| Substance        | Lifetimes (μs) |
|------------------|----------------|
| H <sub>2</sub> O | 279.84 μs      |
| MMA              | 121.55 μs      |
